# Supplementary material for: Whole-Transcriptome Analysis Sheds Light on the Biological Contexts of Intramuscular Fat Deposition in Ningxiang Pigs
Source: MDPI journal article supplement (doi:10.3390/genes15050642), 2024-05-19
Supplement: s1 [file s1]

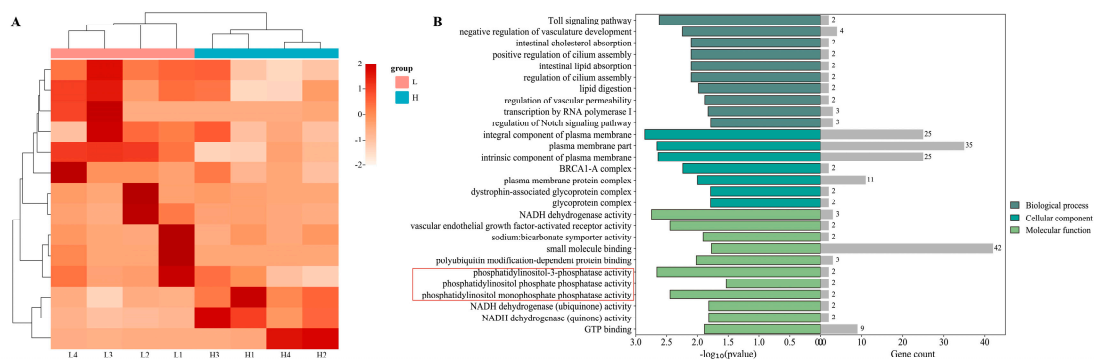

Figure S1. Bioinformatic analysis of DEMIs (a) The Heatmap of DEMIs in the low and high IMF groups; (b) GO enrichment of DEMIs.

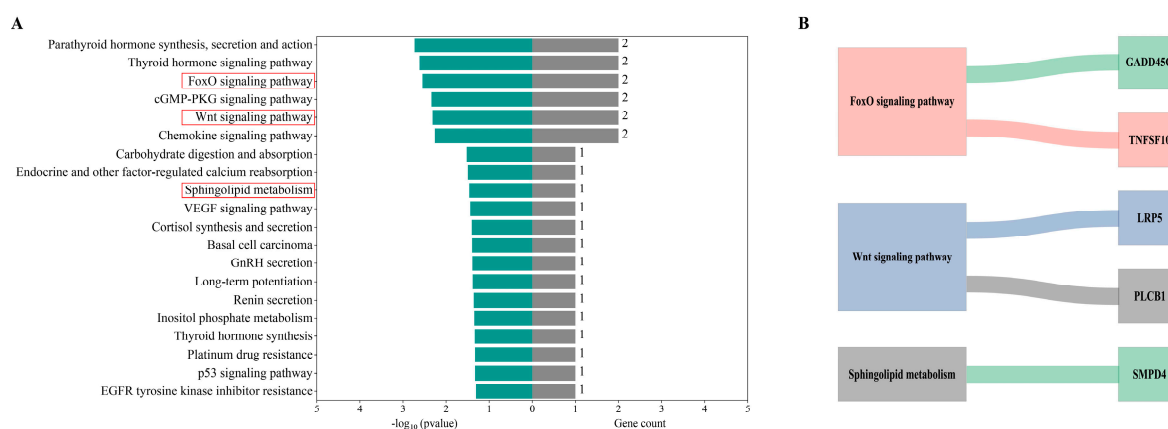

Figure S2. KEGG annotation analysis showing differentially expressed genes. (A) KEGG pathway annotation analysis. (B) Differentially expressed genes involved in fat associated pathways.
