# Supplementary material for: Whole-Transcriptome Analysis Sheds Light on the Biological Contexts of Intramuscular Fat Deposition in Ningxiang Pigs
Source: Genes (Basel). 2024 May 19;15(5):642. doi: 10.3390/genes15050642 (PMC11121357; doi:10.3390/genes15050642)
Supplement: Supplementary file 1 [file genes-15-00642-s001.zip]

Archive with 4 entries (4 files):
- Supplementary Figure.pdf
- Supplementary table S1.xlsx
- Supplementary table S2.xlsx
- Supplementary table S3.xlsx
