# Supplementary material for: Whole-Transcriptome Analysis Sheds Light on the Biological Contexts of Intramuscular Fat Deposition in Ningxiang Pigs
Source: Genes (Basel). 2024 May 19;15(5):642. doi: 10.3390/genes15050642 (PMC11121357; doi:10.3390/genes15050642)
Supplement: Supplementary file 1 [file genes-15-00642-s001.zip › Supplementary table S1.xlsx]

## Sheet: Sheet1
Supplementary Table S1. Ingredient compositions and nutrient levels of diets
Ingredient	Content
Corn, %	42.31
Barley, %	15
Paddy, %	10
Rice bran, %	12.5
43% Soybean meal, %	12.4
Bread scraps, %	4
Stone powder, %	1.07
Calcium hydrogen phosphate, %	0.52
Sodium chloride, %	0.5
70% L-Lysine sulfate, %	0.2
Premixa, %	1.5
Total	100
Calculated nutritional level	Content
CP, %	12.83
NE, kcal/kg	2266.4
Lysb, %	0.6
Met + Cysb, %	0.62
Trpb, %	0.2
Thrb, %	0.71
Ca, %	0.6
Total P, %	0.56
Available P, %	0.23
a Supplied per kilogram of diet: Fe, 90 mg; Cu, 3.5 mg; Mn, 3 mg; Zn, 55 mg; I, 0.15 mg; Se, 0.25 mg; vitamin A, 1350 IU; vitamin D3, 160 IU; vitamin E, 15 IU; vitamin K, 0.5 mg; vitamin B12, 6 μg, riboflavin, 3.5 mg; D-pantothenic acid, 10.5 mg; biotin, 0.1 mg; folic acid, 0.5 mg; choline, 0.45 g. b Standard ileal digestible.
