# Supplementary material for: Whole-Transcriptome Analysis Sheds Light on the Biological Contexts of Intramuscular Fat Deposition in Ningxiang Pigs
Source: Genes (Basel). 2024 May 19;15(5):642. doi: 10.3390/genes15050642 (PMC11121357; doi:10.3390/genes15050642)
Supplement: Supplementary file 1 [file genes-15-00642-s001.zip › Supplementary table S2.xlsx]

## Sheet: Fatty acid determination
SampleID	C12:0	C14:0	C16:0	C16:1	C17:0	C18:0	C18:1n9t	C18:1n9c	C18:2n6c	C20:0	C20:1	C18:3n3	C20:2	C20:3n6	C20:4n6	SFA	USFA	MUFA	PUFA
L	0.128462	1.78956	29.6809	3.76826	0.108527	15.1258	0.102064	39.0754		0.240842	0.781985	0.212884	0.222712	0.210542	1.20047	47.0741	45.5743	43.7277	1.84661
L	0.045568	1.16515	26.1843	3.242	0.12868	14.2267	0.117279	45.2479	6.65793	0.246227	0.897379	0.173971	0.268298	0.204314	1.06403	41.9966	57.8731	49.5045	8.36855
L	0.058168	1.64672	26.8474	2.99334	0.123184	14.1361	0.102656	43.3985	7.27219	0.322461	0.870893	0.205774	0.244851	0.245528	1.53219	43.1341	56.8659	47.3654	9.50054
L	0.190901	1.65984	28.2816	4.34927	0.129682	13.2563	0.080384	40.4815	7.71163	0.228478	0.88085	0.227645	0.304987	0.294295	1.82848	43.7468	56.1591	45.7921	10.367
H	0.155259	1.34873	25.4864	2.96647	0.196589	13.5146	0.083673	38.5806	12.5162	0.19766	0.75627	0.299731	0.428773	0.520463	2.94871	40.8992	59.1008	42.387	16.7138
H	0.109477	1.41992	25.0157	3.02487	0.157768	13.2635	0.114441	35.4394		0.207889	0.800175	0.704658	0.347114	0.588863	4.18767	40.1743	45.2072	39.3789	5.82831
H		1.49988	25.6945	3.20088	0.138306	13.6302	0.092657	37.8121	12.1007	0.186776	0.843612	0.278219	0.467208	0.475078	3.43886	41.1496	58.7093	41.9493	16.7601
H		1.4983	25.5269	3.68582	0.172912	12.8404	0.094012	36.7841	13.3358	0.175546	0.564963	0.273196	0.347198	0.685986	3.84466	40.2141	59.6158	41.1289	18.4869
