# Supplementary material for: Whole-Transcriptome Analysis Sheds Light on the Biological Contexts of Intramuscular Fat Deposition in Ningxiang Pigs
Source: Genes (Basel). 2024 May 19;15(5):642. doi: 10.3390/genes15050642 (PMC11121357; doi:10.3390/genes15050642)
Supplement: Supplementary file 1 [file genes-15-00642-s001.zip › Supplementary table S3.xlsx]

## Sheet: DEGs
Transcript_ID	Gene_id	Symbol	Description	Database_source	G1	G2	G2_vs_G1_log2FoldChange	G2_vs_G1_Pvalue	G2_vs_G1_FDR
ENSSSCT00000043084	ENSSSCG00000021129	PFKM	phosphofructokinase, muscle	ProteinCodingRNA	7.13879	0	-7.13879	8.66129e-05	0.00378173
ENSSSCT00000044605	ENSSSCG00000030546	HSD11B1L	hydroxysteroid 11-beta dehydrogenase 1 like	ProteinCodingRNA	6.99916	0	-6.99916	1.64105e-06	8.83276e-05
ENSSSCT00000040980	ENSSSCG00000001080	CDKAL1	CDK5 regulatory subunit associated protein 1 like 1	ProteinCodingRNA	6.91957	0	-6.91957	7.49295e-18	3.57423e-14
ENSSSCT00000042290	ENSSSCG00000020906	TNFSF10	TNF superfamily member 10	ProteinCodingRNA	6.91208	0	-6.91208	9.58831e-05	0.00413914
ENSSSCT00000051526	ENSSSCG00000029518	RIOK3	RIO kinase 3	ProteinCodingRNA	6.9048	0	-6.9048	0.000102597	0.00439911
ENSSSCT00000045936	ENSSSCG00000036686	CDC42SE2	CDC42 small effector 2	ProteinCodingRNA	6.84786	0	-6.84786	9.02065e-05	0.00391624
ENSSSCT00000047610	ENSSSCG00000005427	---	fukutin	ProteinCodingRNA	6.68217	0	-6.68217	3.65118e-11	4.59844e-09
ENSSSCT00000007757	ENSSSCG00000007085	DSTN	destrin, actin depolymerizing factor	ProteinCodingRNA	6.57157	0	-6.57157	2.94599e-07	1.6436e-05
ENSSSCT00000014246	ENSSSCG00000013033	BAD	BCL2 associated agonist of cell death	ProteinCodingRNA	7.0621	0.510609	-6.55149	4.41441e-12	9.30708e-10
ENSSSCT00000065079	ENSSSCG00000023866	ACSF3	acyl-CoA synthetase family member 3	ProteinCodingRNA	6.53783	0	-6.53783	2.07761e-07	1.16938e-05
ENSSSCT00000012863	ENSSSCG00000011752	FNDC3B	fibronectin type III domain containing 3B	ProteinCodingRNA	6.4285	0	-6.4285	0.000224657	0.00902436
ENSSSCT00000047795	ENSSSCG00000007901	CIITA	class II major histocompatibility complex transactivator	ProteinCodingRNA	6.2751	0	-6.2751	6.95954e-07	3.84903e-05
ENSSSCT00000005577	ENSSSCG00000005060	KTN1	kinectin 1	ProteinCodingRNA	8.37748	2.27507	-6.10241	1.90858e-07	1.07582e-05
ENSSSCT00000009203	ENSSSCG00000008406	CCDC88A	coiled-coil domain containing 88A	ProteinCodingRNA	6.07806	0	-6.07806	1.63256e-06	8.79943e-05
ENSSSCT00000031695	ENSSSCG00000012656	ELF4	E74 like ETS transcription factor 4	ProteinCodingRNA	5.72752	0	-5.72752	3.11132e-06	0.000163993
ENSSSCT00000046746	ENSSSCG00000034978	PNPLA7	patatin like phospholipase domain containing 7	ProteinCodingRNA	5.68455	0	-5.68455	5.24553e-06	0.000268691
ENSSSCT00000050344	ENSSSCG00000031426	ZBTB34	zinc finger and BTB domain containing 34	ProteinCodingRNA	5.68064	0	-5.68064	4.98316e-06	0.000256283
ENSSSCT00000015172	ENSSSCG00000013886	B3GNT3	UDP-GlcNAc:betaGal beta-1,3-N-acetylglucosaminyltransferase 3	ProteinCodingRNA	5.67753	0	-5.67753	5.00362e-06	0.000256644
ENSSSCT00000023490	ENSSSCG00000004999	MIS18BP1	MIS18 binding protein 1	ProteinCodingRNA	5.67288	0	-5.67288	3.63867e-06	0.000190474
ENSSSCT00000057295	ENSSSCG00000010833	TAF1A	TATA-box binding protein associated factor, RNA polymerase I subunit A	ProteinCodingRNA	5.56956	0	-5.56956	1.16589e-12	3.29566e-10
ENSSSCT00000051898	ENSSSCG00000001396	---	---	ProteinCodingRNA	5.47843	0	-5.47843	2.83157e-11	3.72645e-09
ENSSSCT00000044741	ENSSSCG00000024596	NOCT	nocturnin	ProteinCodingRNA	5.91334	0.470221	-5.44312	2.68993e-07	1.50293e-05
ENSSSCT00000053942	ENSSSCG00000014044	NSD1	nuclear receptor binding SET domain protein 1	ProteinCodingRNA	5.39611	0	-5.39611	1.01504e-05	0.000509003
ENSSSCT00000058574	ENSSSCG00000006372	ARHGAP30	Rho GTPase activating protein 30	ProteinCodingRNA	5.33479	0	-5.33479	5.91395e-12	1.1626e-09
ENSSSCT00000009311	ENSSSCG00000008509	RASGRP3	RAS guanyl releasing protein 3	ProteinCodingRNA	5.8339	0.510609	-5.32329	2.26628e-10	1.92116e-08
ENSSSCT00000014194	ENSSSCG00000012984	---	---	ProteinCodingRNA	5.28649	0	-5.28649	1.30856e-05	0.000645264
ENSSSCT00000055502	ENSSSCG00000004612	RAB27A	RAB27A, member RAS oncogene family	ProteinCodingRNA	5.25008	0	-5.25008	1.7257e-09	1.0885e-07
ENSSSCT00000065337	ENSSSCG00000021170	FAR1	fatty acyl-CoA reductase 1	ProteinCodingRNA	5.22175	0	-5.22175	1.7312e-05	0.000844812
ENSSSCT00000059525	ENSSSCG00000014267	---	---	ProteinCodingRNA	5.18774	0	-5.18774	1.54212e-05	0.000757385
ENSSSCT00000042343	ENSSSCG00000022112	DOCK9	dedicator of cytokinesis 9	ProteinCodingRNA	9.93151	4.76282	-5.16869	4.18259e-16	1.22778e-12
ENSSSCT00000024634	ENSSSCG00000029030	SMCHD1	structural maintenance of chromosomes flexible hinge domain containing 1	ProteinCodingRNA	8.61631	3.61615	-5.00016	2.84645e-12	6.73237e-10
ENSSSCT00000017188	ENSSSCG00000015785	CENPU	centromere protein U	ProteinCodingRNA	7.52925	2.63141	-4.89783	6.5464e-10	4.62624e-08
ENSSSCT00000026244	ENSSSCG00000022536	SLC37A2	solute carrier family 37 member 2	ProteinCodingRNA	4.88529	0	-4.88529	3.31354e-05	0.00155724
ENSSSCT00000035790	ENSSSCG00000023565	IKZF5	IKAROS family zinc finger 5	ProteinCodingRNA	4.88275	0	-4.88275	4.66008e-05	0.00215556
ENSSSCT00000064296	ENSSSCG00000035733	PLXNB2	plexin B2	ProteinCodingRNA	4.85647	0	-4.85647	5.27638e-05	0.00239704
ENSSSCT00000048803	ENSSSCG00000024761	SNX13	sorting nexin 13	ProteinCodingRNA	4.84594	0	-4.84594	5.27588e-05	0.00239704
ENSSSCT00000040147	ENSSSCG00000015445	NRCAM	neuronal cell adhesion molecule	ProteinCodingRNA	4.72493	0	-4.72493	4.60325e-07	2.55698e-05
ENSSSCT00000014794	ENSSSCG00000013546	DENND1C	DENN domain containing 1C	ProteinCodingRNA	5.14593	0.539169	-4.60676	1.77591e-08	1.02838e-06
ENSSSCT00000061969	ENSSSCG00000004687	B2M	Beta-2-microglobulin	ProteinCodingRNA	4.58065	0	-4.58065	8.53221e-05	0.00372964
ENSSSCT00000065862	ENSSSCG00000008550	SLC5A6	solute carrier family 5 member 6	ProteinCodingRNA	4.53445	0	-4.53445	9.64885e-05	0.00416056
ENSSSCT00000056677	ENSSSCG00000010138	ZDHHC8	zinc finger DHHC-type containing 8	ProteinCodingRNA	4.5158	0	-4.5158	9.55468e-05	0.00412929
ENSSSCT00000038839	ENSSSCG00000004570	TPM1	---	ProteinCodingRNA	4.4066	0	-4.4066	0.000126851	0.00531953
ENSSSCT00000033954	ENSSSCG00000010212	---	---	ProteinCodingRNA	4.59856	0.224739	-4.37382	1.05495e-05	0.000526934
ENSSSCT00000040435	ENSSSCG00000011471	FLNB	filamin B	ProteinCodingRNA	5.45388	1.1103	-4.34358	3.55715e-06	0.000186719
ENSSSCT00000032161	ENSSSCG00000008456	PLEKHH2	pleckstrin homology, MyTH4 and FERM domain containing H2	ProteinCodingRNA	4.68205	0.36215	-4.3199	6.56461e-06	0.000333572
ENSSSCT00000044303	ENSSSCG00000012179	---	---	ProteinCodingRNA	4.94213	0.736797	-4.20534	4.59565e-06	0.000237635
ENSSSCT00000017263	ENSSSCG00000015854	OCA2	Sus scrofa OCA2 melanosomal transmembrane protein (OCA2), mRNA.	ProteinCodingRNA	4.1769	0	-4.1769	1.00581e-06	5.49895e-05
ENSSSCT00000015430	ENSSSCG00000014126	MSH3	mutS homolog 3	ProteinCodingRNA	4.13063	0	-4.13063	0.000251513	0.00997711
ENSSSCT00000057642	ENSSSCG00000007056	PLCB1	phospholipase C beta 1	ProteinCodingRNA	5.43876	1.35919	-4.07957	1.78579e-05	0.000869228
ENSSSCT00000023766	ENSSSCG00000022289	PCDH1	protocadherin 1	ProteinCodingRNA	4.06598	0	-4.06598	0.000328779	0.0125465
ENSSSCT00000040896	ENSSSCG00000016237	DOCK10	dedicator of cytokinesis 10	ProteinCodingRNA	4.06111	0	-4.06111	0.000348293	0.0131727
MSTRG.8911.2	---	---	---	Predicted_LncRNA	4.03703	0	-4.03703	2.51608e-05	0.00119721
MSTRG.106.2	---	---	---	Predicted_LncRNA	5.78064	1.7791	-4.00154	0.000603246	0.0211435
ENSSSCT00000028125	ENSSSCG00000009836	ACAD10	---	ProteinCodingRNA	3.97725	0	-3.97725	0.000384203	0.0143319
ENSSSCT00000037720	ENSSSCG00000037885	---	---	ProteinCodingRNA	4.14919	0.224739	-3.92446	4.99129e-06	0.000256356
ENSSSCT00000009859	ENSSSCG00000009002	TLR2	toll like receptor 2	ProteinCodingRNA	3.90054	0	-3.90054	0.000377627	0.0141142
ENSSSCT00000055423	ENSSSCG00000008332	C2orf42	chromosome 2 open reading frame 42	ProteinCodingRNA	3.89096	0	-3.89096	0.000462936	0.0168249
ENSSSCT00000058868	ENSSSCG00000030303	ACHE	acetylcholinesterase (Cartwright blood group)	ProteinCodingRNA	5.61319	1.72916	-3.88402	8.2205e-05	0.00361409
ENSSSCT00000017129	ENSSSCG00000015729	TSN	translin	ProteinCodingRNA	6.63748	2.76299	-3.87449	3.19611e-08	1.83133e-06
ENSSSCT00000038360	ENSSSCG00000017694	ACACA	acetyl-CoA carboxylase alpha	ProteinCodingRNA	9.68417	5.88	-3.80418	1.8677e-32	2.37577e-28
ENSSSCT00000053406	ENSSSCG00000010894	TP53BP2	tumor protein p53 binding protein 2	ProteinCodingRNA	4.42116	0.617101	-3.80406	1.68091e-05	0.000823432
ENSSSCT00000055588	ENSSSCG00000037307	---	---	ProteinCodingRNA	4.57246	1.02279	-3.54967	3.00753e-05	0.00141867
ENSSSCT00000048484	ENSSSCG00000007314	---	---	ProteinCodingRNA	3.43468	0	-3.43468	0.00146181	0.0449872
ENSSSCT00000006157	ENSSSCG00000005599	RABEPK	Rab9 effector protein with kelch motifs	ProteinCodingRNA	3.29796	0	-3.29796	0.00158096	0.047935
ENSSSCT00000009593	ENSSSCG00000008768	ARAP2	ArfGAP with RhoGAP domain, ankyrin repeat and PH domain 2	ProteinCodingRNA	3.28133	0	-3.28133	2.56817e-05	0.00121895
ENSSSCT00000034361	ENSSSCG00000033910	IFN-OMEGA-2	Sus scrofa interferon-omega-2 (IFN-OMEGA-2), mRNA.	ProteinCodingRNA	5.04522	1.79322	-3.252	0.000268758	0.0105624
ENSSSCT00000063837	ENSSSCG00000010896	ASPM	abnormal spindle microtubule assembly	ProteinCodingRNA	5.61949	2.3832	-3.23629	0.00160209	0.0482918
ENSSSCT00000027972	ENSSSCG00000022227	BRD4	bromodomain containing 4	ProteinCodingRNA	8.35112	5.12142	-3.2297	0.000536152	0.0191574
ENSSSCT00000061197	ENSSSCG00000036106	TUBG2	tubulin gamma 2	ProteinCodingRNA	7.16108	3.94475	-3.21633	1.44641e-06	7.82926e-05
MSTRG.4635.1	---	---	---	Predicted_LncRNA	3.11034	0	-3.11034	0.000558633	0.0198123
ENSSSCT00000026986	ENSSSCG00000010006	---	SEC14-like protein 2	ProteinCodingRNA	3.53115	0.507401	-3.02375	0.00164949	0.0492922
ENSSSCT00000054241	ENSSSCG00000013478	DOHH	deoxyhypusine hydroxylase	ProteinCodingRNA	4.86806	1.86565	-3.00241	2.65095e-07	1.48333e-05
ENSSSCT00000028258	ENSSSCG00000022026	AIPL1	aryl hydrocarbon receptor interacting protein like 1	ProteinCodingRNA	3.3273	0.390203	-2.9371	0.000263317	0.0103806
ENSSSCT00000040220	ENSSSCG00000004701	CATSPER2	cation channel sperm associated 2	ProteinCodingRNA	2.84946	0	-2.84946	5.40336e-05	0.0024489
ENSSSCT00000038313	ENSSSCG00000010797	EARS2	glutamyl-tRNA synthetase 2, mitochondrial	ProteinCodingRNA	5.12664	2.30471	-2.82193	0.000389065	0.0144709
ENSSSCT00000057118	ENSSSCG00000015661	C4BPB	complement component 4 binding protein beta	ProteinCodingRNA	2.79667	0	-2.79667	0.000156498	0.00645635
ENSSSCT00000003405	ENSSSCG00000003068	SMG9	SMG9, nonsense mediated mRNA decay factor	ProteinCodingRNA	3.25809	0.481846	-2.77624	0.00141259	0.0437192
ENSSSCT00000013820	ENSSSCG00000012639	THOC2	THO complex 2	ProteinCodingRNA	8.55134	5.82587	-2.72548	0.000485846	0.0175572
ENSSSCT00000008168	ENSSSCG00000007464	---	---	ProteinCodingRNA	2.72381	0	-2.72381	0.000498683	0.01797
ENSSSCT00000059274	ENSSSCG00000040433	---	---	ProteinCodingRNA	5.24062	2.52195	-2.71868	5.36548e-05	0.00243463
ENSSSCT00000040081	ENSSSCG00000000370	DGKA	diacylglycerol kinase alpha	ProteinCodingRNA	2.93068	0.224739	-2.70595	0.000805211	0.0271926
ENSSSCT00000038203	ENSSSCG00000029576	ZNF239	zinc finger protein 239	ProteinCodingRNA	6.60387	3.89921	-2.70466	9.3424e-09	5.48485e-07
ENSSSCT00000032316	ENSSSCG00000026217	---	---	ProteinCodingRNA	3.3041	0.630425	-2.67368	0.000326343	0.012466
ENSSSCT00000044190	ENSSSCG00000022039	STARD9	StAR related lipid transfer domain containing 9	ProteinCodingRNA	8.30797	5.6536	-2.65438	0.00058985	0.0207459
ENSSSCT00000007716	ENSSSCG00000007047	MCM8	minichromosome maintenance 8 homologous recombination repair factor	ProteinCodingRNA	6.39485	3.76781	-2.62703	6.01173e-14	4.2484e-11
ENSSSCT00000015474	ENSSSCG00000014165	---	---	ProteinCodingRNA	3.06975	0.470221	-2.59953	0.00161868	0.0486763
ENSSSCT00000061266	ENSSSCG00000034280	LARP1B	---	ProteinCodingRNA	3.21792	0.619258	-2.59866	0.0010328	0.0335999
ENSSSCT00000048290	ENSSSCG00000036556	IL10RB	Sus scrofa interferon alpha and beta receptor subunit 2 (IFNAR2), mRNA.	ProteinCodingRNA	8.0257	5.45935	-2.56635	1.82091e-05	0.000884068
ENSSSCT00000023810	ENSSSCG00000030013	---	---	ProteinCodingRNA	4.06007	1.53977	-2.5203	0.000233351	0.0093245
ENSSSCT00000046859	ENSSSCG00000037002	SERTAD2	SERTA domain containing 2	ProteinCodingRNA	7.95317	5.45633	-2.49684	0.000107056	0.00455449
ENSSSCT00000047177	ENSSSCG00000034103	---	---	ProteinCodingRNA	2.46778	0	-2.46778	0.000364445	0.0136906
ENSSSCT00000049574	ENSSSCG00000011670	PXYLP1	2-phosphoxylose phosphatase 1	ProteinCodingRNA	7.99243	5.5312	-2.46123	1.56513e-20	1.19454e-16
ENSSSCT00000063164	ENSSSCG00000027410	CBFA2T2	CBFA2/RUNX1 translocation partner 2	ProteinCodingRNA	3.72539	1.26827	-2.45712	0.000741917	0.0252834
ENSSSCT00000046899	ENSSSCG00000032017	---	---	Known_LncRNA	2.44188	0	-2.44188	0.00115509	0.036825
ENSSSCT00000059497	ENSSSCG00000035722	---	---	ProteinCodingRNA	2.67094	0.245482	-2.42546	0.000795317	0.0269233
ENSSSCT00000054727	ENSSSCG00000039929	ERCC2	ERCC excision repair 2, TFIIH core complex helicase subunit	ProteinCodingRNA	5.88901	3.47423	-2.41478	8.53484e-07	4.71343e-05
ENSSSCT00000050250	ENSSSCG00000014127	RASGRF2	Ras protein specific guanine nucleotide releasing factor 2	ProteinCodingRNA	6.67275	4.30737	-2.36538	4.97776e-06	0.000256283
ENSSSCT00000052189	ENSSSCG00000015428	PUS7	pseudouridylate synthase 7 (putative)	ProteinCodingRNA	2.34523	0	-2.34523	0.000606073	0.0211685
ENSSSCT00000001140	ENSSSCG00000023956	NEDD9	---	ProteinCodingRNA	5.79017	3.45571	-2.33446	0.000603927	0.0211435
ENSSSCT00000001073	ENSSSCG00000000983	IL17REL	---	ProteinCodingRNA	2.28567	0	-2.28567	0.00127272	0.0400068
ENSSSCT00000050381	ENSSSCG00000033490	---	---	ProteinCodingRNA	2.28425	0	-2.28425	0.00114648	0.0366423
ENSSSCT00000029733	ENSSSCG00000028092	GNG2	G protein subunit gamma 2	ProteinCodingRNA	6.24443	4.00563	-2.2388	1.92727e-05	0.000933332
ENSSSCT00000061398	ENSSSCG00000000612	ATF7IP	activating transcription factor 7 interacting protein	ProteinCodingRNA	5.80981	3.57879	-2.23103	0.000301598	0.0116964
ENSSSCT00000057795	ENSSSCG00000024975	NR5A2	---	ProteinCodingRNA	4.01274	1.81024	-2.20251	0.00163722	0.0490794
ENSSSCT00000012740	ENSSSCG00000011640	TF	Sus scrofa transferrin (TF), mRNA.	ProteinCodingRNA	4.6816	2.54301	-2.13859	0.000360308	0.0136001
ENSSSCT00000065605	ENSSSCG00000017401	ATP6V0A1	ATPase H+ transporting V0 subunit a1	ProteinCodingRNA	4.62445	2.50047	-2.12398	0.000488187	0.0176251
ENSSSCT00000031246	ENSSSCG00000028185	FGD3	FYVE, RhoGEF and PH domain containing 3	ProteinCodingRNA	5.70079	3.65957	-2.04122	0.000190102	0.00773159
ENSSSCT00000033937	ENSSSCG00000006904	GLMN	glomulin, FKBP associated protein	ProteinCodingRNA	6.87873	4.84183	-2.0369	9.41161e-05	0.00407669
ENSSSCT00000045951	ENSSSCG00000006135	CPNE3	copine 3	ProteinCodingRNA	8.8213	6.79	-2.03129	2.07166e-06	0.000110569
ENSSSCT00000053655	ENSSSCG00000032437	RBM4	RNA binding motif protein 4	ProteinCodingRNA	8.43239	6.43872	-1.99368	0.00040397	0.0149234
MSTRG.11867.1	---	---	---	Predicted_LncRNA	4.63485	2.72547	-1.90938	0.00115243	0.0367709
ENSSSCT00000048963	ENSSSCG00000000377	---	---	ProteinCodingRNA	5.62976	3.74378	-1.88599	0.000312944	0.0120265
MSTRG.9014.1	---	---	---	Predicted_LncRNA	4.2603	2.39829	-1.86201	0.000906024	0.030065
ENSSSCT00000059913	ENSSSCG00000012992	FRMD8	FERM domain containing 8	ProteinCodingRNA	6.85702	5.01409	-1.84292	7.72845e-05	0.00342141
ENSSSCT00000051651	ENSSSCG00000005182	CCDC171	coiled-coil domain containing 171	ProteinCodingRNA	5.20047	3.41557	-1.78489	0.0010117	0.0331111
ENSSSCT00000042341	ENSSSCG00000025293	HLTF	helicase like transcription factor	ProteinCodingRNA	6.56484	4.83204	-1.7328	0.000275644	0.0108108
ENSSSCT00000005232	ENSSSCG00000004736	SPTBN5	spectrin beta, non-erythrocytic 5	ProteinCodingRNA	6.41675	4.6945	-1.72226	6.66485e-05	0.00297471
ENSSSCT00000064969	ENSSSCG00000033594	LY6K	---	ProteinCodingRNA	4.00681	2.30387	-1.70294	0.000831288	0.0279742
ENSSSCT00000055143	ENSSSCG00000007309	RBM39	RNA binding motif protein 39	ProteinCodingRNA	8.9803	7.35838	-1.62192	0.000648719	0.022421
ENSSSCT00000064330	ENSSSCG00000015673	KYNU	kynureninase	ProteinCodingRNA	4.24581	2.74853	-1.49728	0.000734386	0.0251119
ENSSSCT00000043425	ENSSSCG00000013397	ARNTL	aryl hydrocarbon receptor nuclear translocator like	ProteinCodingRNA	7.0112	5.54514	-1.46606	5.70439e-05	0.00257615
ENSSSCT00000066245	ENSSSCG00000017509	RPL19	---	ProteinCodingRNA	10.7268	9.31078	-1.41605	0.00073748	0.0251726
ENSSSCT00000041555	ENSSSCG00000029753	CYTIP	cytohesin 1 interacting protein	ProteinCodingRNA	6.36244	4.95777	-1.40467	0.000435	0.0159157
ENSSSCT00000031447	ENSSSCG00000006709	NOTCH2	notch 2	ProteinCodingRNA	7.86393	6.47215	-1.39179	0.00123338	0.0389626
ENSSSCT00000065115	ENSSSCG00000010146	LGALS8	galectin 8	ProteinCodingRNA	7.85694	6.48722	-1.36972	0.00143655	0.0443089
ENSSSCT00000017406	ENSSSCG00000015985	HOXD3	homeobox D3	ProteinCodingRNA	7.46895	6.10001	-1.36893	0.000396588	0.0147077
ENSSSCT00000052297	ENSSSCG00000008304	PRADC1	protease associated domain containing 1	ProteinCodingRNA	6.05486	4.69643	-1.35843	0.000432062	0.0158385
ENSSSCT00000053394	ENSSSCG00000031086	---	Lutropin subunit beta	ProteinCodingRNA	7.13517	5.78802	-1.34715	5.12277e-07	2.8373e-05
ENSSSCT00000037934	ENSSSCG00000011739	PDCD10	programmed cell death 10	ProteinCodingRNA	7.00669	5.67239	-1.3343	7.77876e-08	4.43052e-06
ENSSSCT00000062057	ENSSSCG00000005654	SPTAN1	spectrin alpha, non-erythrocytic 1	ProteinCodingRNA	9.62155	8.29151	-1.33004	0.00158803	0.0480197
ENSSSCT00000062093	ENSSSCG00000040957	CD52	CAMPATH-1 antigen precursor	ProteinCodingRNA	5.88685	4.59607	-1.29077	4.86732e-05	0.00223785
ENSSSCT00000050965	ENSSSCG00000035415	---	---	ProteinCodingRNA	6.96686	5.68546	-1.2814	0.00158272	0.047935
ENSSSCT00000062181	ENSSSCG00000034390	CARD11	caspase recruitment domain family member 11	ProteinCodingRNA	5.06059	3.80518	-1.25541	0.00106007	0.0342825
ENSSSCT00000048234	ENSSSCG00000017289	DDX42	DEAD-box helicase 42	ProteinCodingRNA	8.95904	7.70832	-1.25072	0.000102797	0.00440275
ENSSSCT00000044089	ENSSSCG00000035940	SPSB1	splA/ryanodine receptor domain and SOCS box containing 1	ProteinCodingRNA	8.54017	7.30709	-1.23308	0.00119705	0.0379722
ENSSSCT00000034112	ENSSSCG00000004934	DPP8	dipeptidyl peptidase 8	ProteinCodingRNA	10.4896	9.25881	-1.23079	6.6507e-09	3.92875e-07
ENSSSCT00000046821	ENSSSCG00000000050	NAGA	alpha-N-acetylgalactosaminidase precursor	ProteinCodingRNA	7.19308	5.97246	-1.22062	6.52557e-05	0.00291595
ENSSSCT00000060331	ENSSSCG00000006666	SV2A	synaptic vesicle glycoprotein 2A	ProteinCodingRNA	6.13574	4.95749	-1.17825	0.00050043	0.0180159
ENSSSCT00000018099	ENSSSCG00000016625	CTTNBP2	cortactin binding protein 2	ProteinCodingRNA	7.046	5.87978	-1.16622	0.000368334	0.013821
ENSSSCT00000021806	ENSSSCG00000020211	U6	U6 spliceosomal RNA	OtherNonCodingRNA	5.50243	4.34949	-1.15295	0.000442858	0.0161877
ENSSSCT00000049126	ENSSSCG00000005648	SLC27A4	solute carrier family 27 member 4	ProteinCodingRNA	6.9743	5.83382	-1.14048	0.000258218	0.0102169
ENSSSCT00000039927	ENSSSCG00000031789	ACSL5	acyl-CoA synthetase long chain family member 5	ProteinCodingRNA	7.79954	6.67802	-1.12151	0.000130106	0.00545003
MSTRG.1251.1	---	---	---	Predicted_LncRNA	7.30762	6.19213	-1.11549	0.000369565	0.01384
ENSSSCT00000054580	ENSSSCG00000006294	NME7	NME/NM23 family member 7	ProteinCodingRNA	10.6476	9.56334	-1.08427	1.30191e-05	0.000643551
ENSSSCT00000035578	ENSSSCG00000003410	MASP2	mannan binding lectin serine peptidase 2	ProteinCodingRNA	7.31833	6.2475	-1.07083	0.000873598	0.0291921
ENSSSCT00000037090	ENSSSCG00000010908	PTPRC	protein tyrosine phosphatase, receptor type C	ProteinCodingRNA	8.25797	7.2264	-1.03158	2.83387e-06	0.000149576
ENSSSCT00000047205	ENSSSCG00000021475	SLC4A2	solute carrier family 4 member 2	ProteinCodingRNA	9.69425	8.68526	-1.00899	8.08428e-05	0.00356652
ENSSSCT00000003443	ENSSSCG00000003104	STRN4	striatin 4	ProteinCodingRNA	9.2638	10.27	1.00616	0.000608805	0.021217
ENSSSCT00000056681	ENSSSCG00000040857	---	---	ProteinCodingRNA	8.95514	9.98021	1.02507	0.000649229	0.022421
ENSSSCT00000014464	ENSSSCG00000013244	PACSIN3	protein kinase C and casein kinase substrate in neurons 3	ProteinCodingRNA	8.91167	9.95761	1.04594	0.000450584	0.0164385
ENSSSCT00000039729	ENSSSCG00000039703	EEPD1	endonuclease/exonuclease/phosphatase family domain containing 1	ProteinCodingRNA	9.20548	10.2592	1.05371	0.000138371	0.0057458
ENSSSCT00000051927	ENSSSCG00000017525	NFE2L1	nuclear factor, erythroid 2 like 1	ProteinCodingRNA	12.1695	13.2442	1.07465	0.000225683	0.00905604
ENSSSCT00000044788	ENSSSCG00000003586	EPB41	erythrocyte membrane protein band 4.1	ProteinCodingRNA	10.2016	11.2825	1.08095	1.3772e-08	8.03598e-07
ENSSSCT00000059240	ENSSSCG00000039094	PLEC	plectin	ProteinCodingRNA	12.5837	13.6661	1.08242	0.000293723	0.0114026
ENSSSCT00000057252	ENSSSCG00000006107	PDP1	pyruvate dehyrogenase phosphatase catalytic subunit 1	ProteinCodingRNA	9.21539	10.3208	1.10539	8.2412e-05	0.00361901
ENSSSCT00000023708	ENSSSCG00000020701	TTC9	tetratricopeptide repeat domain 9	ProteinCodingRNA	10.5101	11.6156	1.10542	3.53312e-06	0.000185713
ENSSSCT00000065326	ENSSSCG00000007088	---	---	ProteinCodingRNA	6.23142	7.34251	1.11109	0.00164469	0.0492646
ENSSSCT00000054535	ENSSSCG00000014578	DENND5A	DENN domain containing 5A	ProteinCodingRNA	9.90795	11.0493	1.14131	3.48563e-05	0.00163209
ENSSSCT00000013237	ENSSSCG00000012102	---	---	ProteinCodingRNA	6.05709	7.22076	1.16367	8.33327e-06	0.000419533
ENSSSCT00000037970	ENSSSCG00000028481	CALCOCO1	calcium binding and coiled-coil domain 1	ProteinCodingRNA	10.8605	12.0483	1.18785	9.12053e-10	6.20408e-08
ENSSSCT00000011852	ENSSSCG00000010834	MIA3	MIA family member 3, ER export factor	ProteinCodingRNA	9.69683	10.8996	1.20275	0.000618537	0.0215169
ENSSSCT00000032120	ENSSSCG00000022538	MARK4	microtubule affinity regulating kinase 4	ProteinCodingRNA	7.46675	8.67904	1.21229	4.89846e-05	0.00224946
ENSSSCT00000042331	ENSSSCG00000001512	CUTA	cutA divalent cation tolerance homolog	ProteinCodingRNA	7.09098	8.3091	1.21813	0.00056264	0.0199075
ENSSSCT00000041316	ENSSSCG00000038397	PTK2	protein tyrosine kinase 2	ProteinCodingRNA	9.02222	10.2972	1.27493	4.2093e-06	0.00021883
ENSSSCT00000035593	ENSSSCG00000035249	GADD45G	growth arrest and DNA damage-inducible protein GADD45 gamma	ProteinCodingRNA	8.51769	9.79684	1.27915	0.000289401	0.0112692
ENSSSCT00000059034	ENSSSCG00000011417	DCAF1	DDB1 and CUL4 associated factor 1	ProteinCodingRNA	6.50032	7.79304	1.29272	0.00118824	0.0378187
ENSSSCT00000043665	ENSSSCG00000039024	SPSB3	splA/ryanodine receptor domain and SOCS box containing 3	ProteinCodingRNA	8.26812	9.62574	1.35762	0.000509243	0.0182472
ENSSSCT00000022987	ENSSSCG00000027374	---	---	ProteinCodingRNA	7.71214	9.08725	1.37511	1.18164e-06	6.41431e-05
ENSSSCT00000047467	ENSSSCG00000029169	MAPKAP1	mitogen-activated protein kinase associated protein 1	ProteinCodingRNA	7.26418	8.64406	1.37988	0.000215187	0.00867132
ENSSSCT00000023877	ENSSSCG00000022256	C10orf10	chromosome 10 open reading frame 10	ProteinCodingRNA	7.25105	8.6365	1.38544	0.000312318	0.0120145
ENSSSCT00000046581	ENSSSCG00000010494	---	sorbin and SH3 domain containing 1	ProteinCodingRNA	8.0222	9.41445	1.39226	2.27305e-06	0.000120723
ENSSSCT00000038103	ENSSSCG00000038359	EIF5A	---	ProteinCodingRNA	11.482	12.9035	1.42152	0.000543541	0.0193851
ENSSSCT00000036364	ENSSSCG00000016692	TAX1BP1	Tax1 binding protein 1	ProteinCodingRNA	8.24869	9.67053	1.42184	0.000618475	0.0215169
ENSSSCT00000009295	ENSSSCG00000008493	CEBPZ	CCAAT/enhancer binding protein zeta	ProteinCodingRNA	5.58661	7.0203	1.43368	0.00041918	0.0154107
ENSSSCT00000002998	ENSSSCG00000002704	KARS	lysyl-tRNA synthetase	ProteinCodingRNA	10.5467	11.9829	1.43617	5.12673e-05	0.00234301
ENSSSCT00000048593	ENSSSCG00000012270	UBA1	ubiquitin like modifier activating enzyme 1	ProteinCodingRNA	9.91657	11.3701	1.45354	0.000347224	0.0131583
ENSSSCT00000063664	ENSSSCG00000010603	NEURL1	neuralized E3 ubiquitin protein ligase 1	ProteinCodingRNA	10.3874	11.8413	1.45393	1.49841e-07	8.45871e-06
ENSSSCT00000039881	ENSSSCG00000006174	JPH1	junctophilin 1	ProteinCodingRNA	11.6158	13.0875	1.47168	1.16902e-05	0.000580871
ENSSSCT00000008814	ENSSSCG00000008043	TRAF7	TNF receptor associated factor 7	ProteinCodingRNA	5.92558	7.4061	1.48052	0.000195301	0.00792859
ENSSSCT00000004042	ENSSSCG00000003646	POU3F1	POU class 3 homeobox 1	ProteinCodingRNA	4.48201	5.96606	1.48404	0.000464612	0.0168697
ENSSSCT00000059635	ENSSSCG00000011511	FRMD4B	FERM domain containing 4B	ProteinCodingRNA	6.33173	7.82872	1.49699	0.001585	0.0479661
ENSSSCT00000027674	ENSSSCG00000021821	MYO1C	myosin IC	ProteinCodingRNA	8.70022	10.2101	1.50985	1.6346e-08	9.50881e-07
ENSSSCT00000063134	ENSSSCG00000012642	STAG2	stromal antigen 2	ProteinCodingRNA	7.60231	9.13028	1.52797	2.05352e-06	0.000109754
ENSSSCT00000027856	ENSSSCG00000029515	PON3	paraoxonase 3	ProteinCodingRNA	5.8131	7.34443	1.53132	1.02787e-05	0.000514759
ENSSSCT00000058949	ENSSSCG00000025156	BRWD3	bromodomain and WD repeat domain containing 3	ProteinCodingRNA	6.83048	8.44296	1.61248	7.19261e-05	0.00318789
ENSSSCT00000066087	ENSSSCG00000005771	HDHD2	haloacid dehalogenase like hydrolase domain containing 2	ProteinCodingRNA	2.89094	4.57865	1.68771	0.000893369	0.0296967
ENSSSCT00000047161	ENSSSCG00000011760	TBL1XR1	transducin beta like 1 X-linked receptor 1	ProteinCodingRNA	6.9125	8.62415	1.71165	2.05469e-05	0.000990014
ENSSSCT00000047386	ENSSSCG00000012273	USP11	ubiquitin specific peptidase 11	ProteinCodingRNA	7.40239	9.1515	1.74911	0.000268675	0.0105624
ENSSSCT00000051979	ENSSSCG00000039094	PLEC	plectin	ProteinCodingRNA	11.0557	12.839	1.78327	6.26673e-06	0.000319285
ENSSSCT00000039801	ENSSSCG00000015660	PFKFB2	6-phosphofructo-2-kinase/fructose-2,6-biphosphatase 2	ProteinCodingRNA	1.91962	3.80929	1.88967	0.00034295	0.0130093
ENSSSCT00000062063	ENSSSCG00000003268	TSEN34	tRNA splicing endonuclease subunit 34	ProteinCodingRNA	4.12454	6.03723	1.91269	0.000433011	0.0158581
ENSSSCT00000046857	ENSSSCG00000009244	SEC31A	SEC31 homolog A, COPII coat complex component	ProteinCodingRNA	7.18518	9.11338	1.9282	0.000743089	0.0252962
ENSSSCT00000060392	ENSSSCG00000010640	NRAP	nebulin related anchoring protein	ProteinCodingRNA	10.0004	11.9538	1.95348	0.00096322	0.0316874
ENSSSCT00000061205	ENSSSCG00000031086	---	Lutropin subunit beta	ProteinCodingRNA	4.86568	6.92149	2.0558	0.000106138	0.00453057
ENSSSCT00000010434	ENSSSCG00000009516	UBAC2	UBA domain containing 2	ProteinCodingRNA	8.13185	10.2237	2.09186	0.00132725	0.0413463
ENSSSCT00000016948	ENSSSCG00000015558	SMG7	SMG7, nonsense mediated mRNA decay factor	ProteinCodingRNA	7.92035	10.039	2.11864	0.0013993	0.0433431
ENSSSCT00000044724	ENSSSCG00000015747	---	---	ProteinCodingRNA	7.46511	9.63287	2.16776	0.000173948	0.00713769
ENSSSCT00000010749	ENSSSCG00000009806	SETD1B	SET domain containing 1B	ProteinCodingRNA	4.86992	7.13856	2.26864	0.00013459	0.00561935
MSTRG.12083.2	---	---	---	Predicted_LncRNA	4.93455	7.21835	2.28379	4.83392e-05	0.00222787
ENSSSCT00000056030	ENSSSCG00000036877	---	---	ProteinCodingRNA	3.65238	5.94055	2.28818	3.12038e-05	0.00146827
ENSSSCT00000028851	ENSSSCG00000029236	ZBTB7A	zinc finger and BTB domain containing 7A	ProteinCodingRNA	4.2168	6.75201	2.53522	9.14933e-07	5.0237e-05
ENSSSCT00000041227	ENSSSCG00000032790	---	---	ProteinCodingRNA	0.683864	3.24017	2.55631	0.0010372	0.0336571
ENSSSCT00000038748	ENSSSCG00000031228	OPRL1	nociceptin receptor	ProteinCodingRNA	1.67823	4.35011	2.67188	2.02677e-05	0.00097903
ENSSSCT00000050891	ENSSSCG00000010640	NRAP	nebulin related anchoring protein	ProteinCodingRNA	8.15787	10.8786	2.72069	8.38387e-08	4.76096e-06
ENSSSCT00000056643	ENSSSCG00000036688	ZNF354A	zinc finger protein 354A	ProteinCodingRNA	2.87085	5.65469	2.78384	0.000363748	0.0136893
ENSSSCT00000041975	ENSSSCG00000009978	AP1B1	adaptor related protein complex 1 beta 1 subunit	ProteinCodingRNA	3.8465	6.66775	2.82126	1.85818e-05	0.000901019
ENSSSCT00000054676	ENSSSCG00000003771	FUBP1	far upstream element binding protein 1	ProteinCodingRNA	4.08882	6.91793	2.8291	0.00023157	0.00926306
ENSSSCT00000046818	ENSSSCG00000028983	TBC1D1	TBC1 domain family member 1	ProteinCodingRNA	1.4455	4.28393	2.83843	8.87996e-05	0.00386395
ENSSSCT00000046810	ENSSSCG00000006202	CSPP1	centrosome and spindle pole associated protein 1	ProteinCodingRNA	3.92451	6.78895	2.86444	0.000211035	0.00853104
MSTRG.10429.17	---	---	---	Predicted_LncRNA	1.0144	3.96793	2.95353	0.00142766	0.0440785
ENSSSCT00000043430	ENSSSCG00000023264	---	---	ProteinCodingRNA	3.91477	6.94413	3.02936	2.56088e-05	0.00121701
ENSSSCT00000060441	ENSSSCG00000034329	NAT14	N-acetyltransferase 14 (putative)	ProteinCodingRNA	0	3.0947	3.0947	0.000398442	0.0147478
ENSSSCT00000047142	ENSSSCG00000014917	CCDC81	coiled-coil domain containing 81	ProteinCodingRNA	4.52371	7.7616	3.23788	6.87782e-09	4.05664e-07
ENSSSCT00000044765	ENSSSCG00000028040	C19orf24	chromosome 19 open reading frame 24	ProteinCodingRNA	0	3.29688	3.29688	4.10894e-06	0.00021421
ENSSSCT00000052025	ENSSSCG00000035934	TXNDC16	thioredoxin domain containing 16	ProteinCodingRNA	4.00267	7.36254	3.35987	8.93575e-07	4.91934e-05
MSTRG.1422.1	---	---	---	Predicted_LncRNA	0	3.38339	3.38339	0.00137908	0.0427864
ENSSSCT00000053875	ENSSSCG00000005367	TSTD2	thiosulfate sulfurtransferase like domain containing 2	ProteinCodingRNA	4.48908	7.97699	3.48791	4.21477e-06	0.00021883
ENSSSCT00000005496	ENSSSCG00000004983	---	---	ProteinCodingRNA	0	3.52304	3.52304	0.00113019	0.0362127
ENSSSCT00000049960	ENSSSCG00000029811	PLCL2	phospholipase C like 2	ProteinCodingRNA	0	3.54261	3.54261	1.83842e-06	9.86725e-05
ENSSSCT00000032997	ENSSSCG00000012270	UBA1	ubiquitin like modifier activating enzyme 1	ProteinCodingRNA	7.58103	11.1287	3.54771	1.11908e-14	1.37783e-11
ENSSSCT00000053008	ENSSSCG00000038516	---	---	Known_LncRNA	0	3.55415	3.55415	6.96148e-06	0.000353267
ENSSSCT00000009573	ENSSSCG00000008750	PACRGL	parkin coregulated like	ProteinCodingRNA	0	3.57851	3.57851	0.00109548	0.0352188
ENSSSCT00000026471	ENSSSCG00000012885	LRP5	LDL receptor related protein 5	ProteinCodingRNA	5.16833	8.78608	3.61774	7.78368e-09	4.58385e-07
ENSSSCT00000007934	ENSSSCG00000040248	COMMD7	COMM domain containing 7	ProteinCodingRNA	0	3.68472	3.68472	0.000814964	0.0274976
ENSSSCT00000041463	ENSSSCG00000011833	DLG1	discs large MAGUK scaffold protein 1	ProteinCodingRNA	0.229828	4.01964	3.78981	0.000281404	0.0109958
ENSSSCT00000029394	ENSSSCG00000024363	---	---	ProteinCodingRNA	4.5567	8.44337	3.88667	0.000892024	0.0296967
ENSSSCT00000045365	ENSSSCG00000032106	SURF6	surfeit 6	ProteinCodingRNA	0.668903	4.56331	3.8944	6.02907e-05	0.00271957
ENSSSCT00000060467	ENSSSCG00000011912	QTRT2	queuine tRNA-ribosyltransferase accessory subunit 2	ProteinCodingRNA	0	4.014	4.014	0.000373089	0.0139583
ENSSSCT00000050818	ENSSSCG00000006303	DCAF6	DDB1 and CUL4 associated factor 6	ProteinCodingRNA	4.31112	8.3263	4.01518	4.41257e-09	2.61879e-07
ENSSSCT00000040954	ENSSSCG00000010476	MYOF	myoferlin	ProteinCodingRNA	3.17138	7.20739	4.03602	0.000321553	0.0123077
ENSSSCT00000040645	ENSSSCG00000034980	IRF8	interferon regulatory factor 8	ProteinCodingRNA	0	4.05263	4.05263	0.000394924	0.0146602
ENSSSCT00000052727	ENSSSCG00000011497	MAGI1	membrane associated guanylate kinase, WW and PDZ domain containing 1	ProteinCodingRNA	0	4.12223	4.12223	0.000324084	0.0123922
ENSSSCT00000045937	ENSSSCG00000014082	POLK	DNA polymerase kappa	ProteinCodingRNA	0.38229	4.56473	4.18244	5.10489e-05	0.00233863
ENSSSCT00000048796	ENSSSCG00000026427	RORC	RAR related orphan receptor C	ProteinCodingRNA	0.38229	4.59223	4.20994	2.81865e-06	0.000148979
ENSSSCT00000044855	ENSSSCG00000004383	OSTM1	osteopetrosis associated transmembrane protein 1	ProteinCodingRNA	0	4.23981	4.23981	1.08493e-07	6.15187e-06
ENSSSCT00000043063	ENSSSCG00000000094	SUN2	Sad1 and UNC84 domain containing 2	ProteinCodingRNA	5.0287	9.31177	4.28307	1.52985e-08	8.91308e-07
ENSSSCT00000033626	ENSSSCG00000011106	CREM	cAMP responsive element modulator	ProteinCodingRNA	0	4.38301	4.38301	0.000190246	0.00773159
ENSSSCT00000037872	ENSSSCG00000033655	TUBB2B	tubulin beta-2B chain	ProteinCodingRNA	0	4.39847	4.39847	0.000187471	0.00764325
ENSSSCT00000039231	ENSSSCG00000021106	GRIPAP1	GRIP1 associated protein 1	ProteinCodingRNA	0	4.43334	4.43334	0.000133316	0.00557224
ENSSSCT00000012126	ENSSSCG00000011079	PIP4K2A	phosphatidylinositol-5-phosphate 4-kinase type 2 alpha	ProteinCodingRNA	0	4.43638	4.43638	0.000146434	0.00605426
ENSSSCT00000018646	ENSSSCG00000017128	HEXDC	---	ProteinCodingRNA	0	4.50412	4.50412	0.000115958	0.00490043
MSTRG.106.3	---	---	---	Predicted_LncRNA	0	4.5302	4.5302	0.000111793	0.00474543
ENSSSCT00000024891	ENSSSCG00000024096	RIPK2	receptor interacting serine/threonine kinase 2	ProteinCodingRNA	0	4.55712	4.55712	0.000106813	0.00454919
ENSSSCT00000062002	ENSSSCG00000001641	UBR2	ubiquitin protein ligase E3 component n-recognin 2	ProteinCodingRNA	0	4.62289	4.62289	9.90692e-05	0.00426702
ENSSSCT00000064521	ENSSSCG00000007874	ABCC1	---	ProteinCodingRNA	5.95546	10.675	4.71955	1.8821e-06	0.000100733
ENSSSCT00000023606	ENSSSCG00000024681	TECRL	trans-2,3-enoyl-CoA reductase like	ProteinCodingRNA	0	4.76065	4.76065	6.1052e-05	0.00275066
ENSSSCT00000024746	ENSSSCG00000028249	SKA3	spindle and kinetochore associated complex subunit 3	ProteinCodingRNA	0	4.77187	4.77187	1.45996e-06	7.89145e-05
ENSSSCT00000062539	ENSSSCG00000039194	KANK2	KN motif and ankyrin repeat domains 2	ProteinCodingRNA	0.286613	5.07564	4.78903	9.41775e-07	5.16366e-05
ENSSSCT00000038543	ENSSSCG00000037595	AP3S1	adaptor related protein complex 3 sigma 1 subunit	ProteinCodingRNA	0	4.79685	4.79685	6.87744e-05	0.00306187
ENSSSCT00000048009	ENSSSCG00000004339	UFL1	E3 UFM1-protein ligase 1	ProteinCodingRNA	0	4.83192	4.83192	5.12025e-05	0.00234285
ENSSSCT00000045032	ENSSSCG00000033655	TUBB2B	tubulin beta-2B chain	ProteinCodingRNA	1.31236	6.21	4.89764	2.34974e-05	0.00112226
ENSSSCT00000046312	ENSSSCG00000023306	ELMO2	engulfment and cell motility 2	ProteinCodingRNA	3.19795	8.1546	4.95665	5.00682e-16	1.3304e-12
ENSSSCT00000033376	ENSSSCG00000016991	DUSP1	dual specificity phosphatase 1	ProteinCodingRNA	6.58367	11.5584	4.97472	0.000608375	0.021217
ENSSSCT00000060963	ENSSSCG00000007314	---	---	ProteinCodingRNA	0	5.15006	5.15006	9.56936e-07	5.23926e-05
ENSSSCT00000060912	ENSSSCG00000002787	E2F4	E2F transcription factor 4	ProteinCodingRNA	0	5.15489	5.15489	2.40015e-05	0.00114347
ENSSSCT00000058987	ENSSSCG00000000510	TMEM19	transmembrane protein 19	ProteinCodingRNA	1.11132	6.28957	5.17825	2.09069e-06	0.000111429
ENSSSCT00000065898	ENSSSCG00000010053	---	---	ProteinCodingRNA	0	5.21947	5.21947	2.04993e-05	0.000988969
ENSSSCT00000044426	ENSSSCG00000005205	KIAA2026	KIAA2026	ProteinCodingRNA	0	5.34022	5.34022	1.47133e-05	0.000723551
ENSSSCT00000062883	ENSSSCG00000011867	MYLK	myosin light chain kinase	ProteinCodingRNA	0	5.41671	5.41671	1.2123e-05	0.000600813
ENSSSCT00000059402	ENSSSCG00000016692	TAX1BP1	Tax1 binding protein 1	ProteinCodingRNA	0	5.43639	5.43639	1.26264e-05	0.000624949
ENSSSCT00000059592	ENSSSCG00000028124	SNRPN	small nuclear ribonucleoprotein polypeptide N	ProteinCodingRNA	0	5.65374	5.65374	5.41333e-06	0.000276914
ENSSSCT00000056039	ENSSSCG00000010105	SMPD4	sphingomyelin phosphodiesterase 4	ProteinCodingRNA	0	5.65703	5.65703	5.73729e-06	0.000293093
MSTRG.1466.4	---	---	---	Predicted_LncRNA	0	5.81827	5.81827	4.16197e-06	0.000216678
ENSSSCT00000063461	ENSSSCG00000023306	ELMO2	engulfment and cell motility 2	ProteinCodingRNA	1.78631	7.66148	5.87516	4.96514e-06	0.000256047
ENSSSCT00000045393	ENSSSCG00000006698	BCL9	B-cell CLL/lymphoma 9	ProteinCodingRNA	3.00189	8.89622	5.89434	5.66108e-40	1.08016e-35
ENSSSCT00000054992	ENSSSCG00000005955	EFR3A	EFR3 homolog A	ProteinCodingRNA	2.10658	8.06135	5.95477	9.97189e-05	0.00428533
ENSSSCT00000042806	ENSSSCG00000009714	NEK1	NIMA related kinase 1	ProteinCodingRNA	1.10418	7.11524	6.01106	1.78651e-06	9.60211e-05
ENSSSCT00000040285	ENSSSCG00000027157	SLC40A1	solute carrier family 40 member 1	ProteinCodingRNA	0	6.10332	6.10332	7.46305e-11	8.13226e-09
ENSSSCT00000044980	ENSSSCG00000034502	H6PD	hexose-6-phosphate dehydrogenase/glucose 1-dehydrogenase	ProteinCodingRNA	3.26606	9.44147	6.17541	5.26385e-91	2.00874e-86
ENSSSCT00000009599	ENSSSCG00000028983	TBC1D1	TBC1 domain family member 1	ProteinCodingRNA	0	6.22004	6.22004	1.42742e-14	1.65066e-11
ENSSSCT00000036893	ENSSSCG00000003859	ZCCHC11	zinc finger CCHC-type containing 11	ProteinCodingRNA	0	6.24113	6.24113	1.10755e-06	6.03787e-05
ENSSSCT00000019259	ENSSSCG00000017694	ACACA	acetyl-CoA carboxylase alpha	ProteinCodingRNA	0	6.27355	6.27355	1.16259e-08	6.81501e-07
ENSSSCT00000042404	ENSSSCG00000001080	CDKAL1	CDK5 regulatory subunit associated protein 1 like 1	ProteinCodingRNA	0	6.34625	6.34625	8.24522e-16	1.85086e-12
ENSSSCT00000061878	ENSSSCG00000015720	BIN1	bridging integrator 1	ProteinCodingRNA	0	6.43654	6.43654	0.00034786	0.0131693
ENSSSCT00000040346	ENSSSCG00000011670	PXYLP1	2-phosphoxylose phosphatase 1	ProteinCodingRNA	0.668903	7.17122	6.50232	3.49285e-13	1.37993e-10
ENSSSCT00000063076	ENSSSCG00000004294	---	---	ProteinCodingRNA	0	6.60837	6.60837	2.62147e-07	1.46898e-05
ENSSSCT00000027492	ENSSSCG00000013245	ARFGAP2	ADP ribosylation factor GTPase activating protein 2	ProteinCodingRNA	0	6.71641	6.71641	0.000135687	0.00565895
ENSSSCT00000012079	ENSSSCG00000011036	STAM	signal transducing adaptor molecule	ProteinCodingRNA	0	6.79377	6.79377	2.2152e-17	8.45341e-14
ENSSSCT00000034722	ENSSSCG00000012486	CSTF2	cleavage stimulation factor subunit 2	ProteinCodingRNA	0	6.92771	6.92771	8.69053e-17	3.0149e-13
ENSSSCT00000032254	ENSSSCG00000008406	CCDC88A	coiled-coil domain containing 88A	ProteinCodingRNA	0.789797	7.91306	7.12327	6.77296e-13	2.19036e-10
ENSSSCT00000032685	ENSSSCG00000007478	ATP9A	ATPase phospholipid transporting 9A (putative)	ProteinCodingRNA	0	7.12908	7.12908	1.78296e-19	1.13399e-15
ENSSSCT00000028565	ENSSSCG00000011548	BRPF1	bromodomain and PHD finger containing 1	ProteinCodingRNA	0.553614	7.77785	7.22423	1.64468e-09	1.0513e-07
ENSSSCT00000054893	ENSSSCG00000011367	ARIH2	ariadne RBR E3 ubiquitin protein ligase 2	ProteinCodingRNA	0	7.82205	7.82205	3.65093e-05	0.00170739
ENSSSCT00000043618	ENSSSCG00000008487	ATL2	atlastin GTPase 2	ProteinCodingRNA	0	8.38101	8.38101	2.2587e-05	0.00108013
ENSSSCT00000044440	ENSSSCG00000004725	ZNF106	zinc finger protein 106	ProteinCodingRNA	0	8.89573	8.89573	1.44581e-25	1.37933e-21

## Sheet: DEMs
ID	GroupA_mean_CPM	GroupC_mean_CPM	FoldChange_Log2	P.value	P.value.adj
10_19512	2.1	0	-1.63227	3.81527e-07	0.000114744
12_20489	4.6	0	-2.48543	2.09993e-16	2.52621e-13
17_30849_star	8.3	2.3	-1.49476	0.0012943	0.121539
2_4068	0.5	5	2	5.59533e-09	2.24373e-06
5_10876	0.3	8	2.79141	1.66655e-14	1.00243e-11
6_11371	4.6	1.7	-1.05247	0.0125376	0.754135
7_15045	12.4	32.5	1.32193	7.52145e-06	0.00180966
7_15412	60.3	28.2	-1.06992	0.00131339	0.121539
AEMK02000465.1_34043	6.8	2.6	-1.11548	0.00906847	0.641728
ssc-miR-122-5p	33.1	15.2	-1.07378	0.010884	0.727417
ssc-miR-141	1.7	0.2	-1.16993	7.05048e-05	0.0141362
ssc-miR-190a	59.6	28.7	-1.02885	0.0166443	0.82646
ssc-miR-215	1.2	0.1	-1	0.000409069	0.0643859
ssc-miR-7134-3p	3533	1750.3	-1.01288	0.000744339	0.089544

## Sheet: DELs
Transcript_ID	Gene_id	Symbol	Description	Protein_coding_within_3kb	Database_source	G1	G2	G2_vs_G1_log2FoldChange	G2_vs_G1_Pvalue	G2_vs_G1_FDR
MSTRG.11982.1	---	---	---	---	Predicted_LncRNA	2.01806	0	-2.01806	0.0233594	0.314212
MSTRG.4282.1	---	---	---	---	Predicted_LncRNA	6.32044	5.0139	-1.30654	0.00443034	0.105113
MSTRG.12308.2	---	---	---	ENSSSCT00000037023,ENSSSCT00000036813	Predicted_LncRNA	7.61384	6.55919	-1.05464	0.0476983	0.466004
MSTRG.4825.1	---	---	---	---	Predicted_LncRNA	1.56316	0	-1.56316	5.59584e-10	4.08304e-08
ENSSSCT00000053008	ENSSSCG00000038516	---	---	---	Known_LncRNA	0	3.55415	3.55415	6.96148e-06	0.000353267
MSTRG.12297.8	---	---	---	ENSSSCT00000037482	Predicted_LncRNA	2.7187	0	-2.7187	3.51593e-14	3.27247e-11
MSTRG.6079.1	---	---	---	ENSSSCT00000014486,ENSSSCT00000045828,ENSSSCT00000039176,ENSSSCT00000035985	Predicted_LncRNA	5.88352	4.62877	-1.25475	0.00695957	0.143326
MSTRG.7140.1	---	---	---	ENSSSCT00000049982,ENSSSCT00000039124	Predicted_LncRNA	1.28641	3.68212	2.39571	0.0437305	0.446203
ENSSSCT00000059159	ENSSSCG00000035711	---	---	---	Known_LncRNA	2.79938	0	-2.79938	0.0050776	0.115337
ENSSSCT00000044651	ENSSSCG00000036020	---	---	ENSSSCT00000018124,ENSSSCT00000053161,ENSSSCT00000037209	Known_LncRNA	8.99914	7.87974	-1.1194	0.00559881	0.12393
MSTRG.10429.16	---	---	---	ENSSSCT00000057961,ENSSSCT00000001333,ENSSSCT00000001334,ENSSSCT00000046293,ENSSSCT00000035823,ENSSSCT00000045563,ENSSSCT00000040724,ENSSSCT00000032859,ENSSSCT00000059693,ENSSSCT00000045536,ENSSSCT00000001329,ENSSSCT00000060690,ENSSSCT00000035331,ENSSSCT00000034266,ENSSSCT00000001524,ENSSSCT00000065399,ENSSSCT00000036412,ENSSSCT00000060203,ENSSSCT00000044584,ENSSSCT00000060862,ENSSSCT00000001335	Predicted_LncRNA	2.9963	4.4233	1.42699	0.0168655	0.255193
MSTRG.10429.17	---	---	---	ENSSSCT00000057961,ENSSSCT00000001333,ENSSSCT00000001334,ENSSSCT00000046293,ENSSSCT00000035823,ENSSSCT00000045563,ENSSSCT00000040724,ENSSSCT00000032859,ENSSSCT00000059693,ENSSSCT00000045536,ENSSSCT00000001329,ENSSSCT00000060690,ENSSSCT00000035331,ENSSSCT00000034266,ENSSSCT00000001524,ENSSSCT00000065399,ENSSSCT00000036412,ENSSSCT00000060203,ENSSSCT00000044584,ENSSSCT00000060862,ENSSSCT00000001335	Predicted_LncRNA	1.0144	3.96793	2.95353	0.00142766	0.0440785
MSTRG.2880.1	---	---	---	ENSSSCT00000064934,ENSSSCT00000025271	Predicted_LncRNA	10.3637	8.89342	-1.47027	0.00451301	0.106308
MSTRG.8583.1	---	---	---	ENSSSCT00000052781,ENSSSCT00000000081,ENSSSCT00000064575,ENSSSCT00000045761	Predicted_LncRNA	5.12933	3.68072	-1.44861	0.00909238	0.170252
ENSSSCT00000060605	ENSSSCG00000037997	---	---	ENSSSCT00000040888,ENSSSCT00000011850	Known_LncRNA	3.6315	1.90132	-1.73018	0.0329552	0.382013
MSTRG.1747.1	---	---	---	---	Predicted_LncRNA	2.08162	0	-2.08162	0.0198986	0.282706
MSTRG.3285.1	---	---	---	---	Predicted_LncRNA	2.67799	0.913436	-1.76455	0.046207	0.459793
MSTRG.3071.1	---	---	---	---	Predicted_LncRNA	3.15396	0	-3.15396	0.00253558	0.0693622
MSTRG.10565.1	---	---	---	ENSSSCT00000065662	Predicted_LncRNA	3.51812	2.46113	-1.05699	0.0465709	0.46151
MSTRG.4439.2	---	---	---	ENSSSCT00000055278	Predicted_LncRNA	0	2.01683	2.01683	2.03947e-10	1.80318e-08
MSTRG.5447.2	---	---	---	ENSSSCT00000008170	Predicted_LncRNA	0	4.17251	4.17251	8.36368e-14	5.4096e-11
MSTRG.3471.4	---	---	---	ENSSSCT00000022985,ENSSSCT00000053826,ENSSSCT00000010658	Predicted_LncRNA	11.1285	9.64138	-1.48716	0.0109858	0.195263
MSTRG.4433.1	---	---	---	ENSSSCT00000053020,ENSSSCT00000044284,ENSSSCT00000024565,ENSSSCT00000040696,ENSSSCT00000017293,ENSSSCT00000017295,ENSSSCT00000065361,ENSSSCT00000017294	Predicted_LncRNA	3.08968	1.21895	-1.87073	0.00667557	0.139511
ENSSSCT00000046899	ENSSSCG00000032017	---	---	---	Known_LncRNA	2.44188	0	-2.44188	0.00115509	0.036825
ENSSSCT00000059713	ENSSSCG00000040155	---	---	---	Known_LncRNA	5.69832	4.55851	-1.13981	0.00660009	0.138821
MSTRG.2442.1	---	---	---	ENSSSCT00000066146,ENSSSCT00000019596,ENSSSCT00000061472,ENSSSCT00000056000,ENSSSCT00000064728,ENSSSCT00000019599	Predicted_LncRNA	3.72983	1.00946	-2.72037	6.96023e-05	0.00309207
MSTRG.2042.1	---	---	---	---	Predicted_LncRNA	4.73515	2.48832	-2.24683	0.00143745	0.0443089
MSTRG.9014.1	---	---	---	ENSSSCT00000030858,ENSSSCT00000049846,ENSSSCT00000064554,ENSSSCT00000063011	Predicted_LncRNA	4.2603	2.39829	-1.86201	0.000906024	0.030065
MSTRG.1067.1	---	---	---	ENSSSCT00000047345,ENSSSCT00000006145	Predicted_LncRNA	3.76228	1.11371	-2.64858	0.0052739	0.118596
MSTRG.11146.1	---	---	---	ENSSSCT00000029467	Predicted_LncRNA	2.55224	4.45206	1.89981	0.0497266	0.476429
MSTRG.223.1	---	---	---	ENSSSCT00000065167,ENSSSCT00000054435,ENSSSCT00000055714,ENSSSCT00000063919,ENSSSCT00000062332,ENSSSCT00000062922,ENSSSCT00000058746,ENSSSCT00000039201,ENSSSCT00000004730	Predicted_LncRNA	3.80742	1.27559	-2.53183	0.00205157	0.0587762
MSTRG.5529.1	---	---	---	ENSSSCT00000017870,ENSSSCT00000044542,ENSSSCT00000052669,ENSSSCT00000059931	Predicted_LncRNA	3.38135	1.78211	-1.59924	0.0176712	0.26311
MSTRG.6015.5	---	---	---	ENSSSCT00000063370,ENSSSCT00000057910,ENSSSCT00000062935,ENSSSCT00000050594,ENSSSCT00000043352,ENSSSCT00000065398	Predicted_LncRNA	7.82702	6.35342	-1.47361	0.0174344	0.260796
ENSSSCT00000063905	ENSSSCG00000039062	---	---	---	Known_LncRNA	4.12251	0.36215	-3.76036	0.000913428	0.0302844
MSTRG.7896.1	---	---	---	ENSSSCT00000041765,ENSSSCT00000042108,ENSSSCT00000054858,ENSSSCT00000043801,ENSSSCT00000044289,ENSSSCT00000064984,ENSSSCT00000062974,ENSSSCT00000006570	Predicted_LncRNA	3.28465	0.507401	-2.77725	0.0201735	0.2846
MSTRG.12111.1	---	---	---	---	Predicted_LncRNA	0	2.38046	2.38046	0.012864	0.217214
MSTRG.623.1	---	---	---	---	Predicted_LncRNA	2.52057	0	-2.52057	0.00878578	0.16672
MSTRG.10429.21	---	---	---	ENSSSCT00000057961,ENSSSCT00000035823,ENSSSCT00000045563,ENSSSCT00000040724,ENSSSCT00000001329,ENSSSCT00000060690,ENSSSCT00000035331,ENSSSCT00000034266,ENSSSCT00000001524,ENSSSCT00000065399,ENSSSCT00000036412,ENSSSCT00000060203,ENSSSCT00000044584,ENSSSCT00000060862	Predicted_LncRNA	3.35188	7.6239	4.27202	0.00728102	0.147089
MSTRG.4313.2	---	---	---	ENSSSCT00000024092,ENSSSCT00000040879,ENSSSCT00000042638,ENSSSCT00000017131,ENSSSCT00000060889	Predicted_LncRNA	1.75798	0	-1.75798	8.13475e-11	8.67124e-09
ENSSSCT00000044292	ENSSSCG00000034335	---	---	---	Known_LncRNA	3.89405	2.6188	-1.27525	0.0450711	0.453056
MSTRG.4269.1	---	---	---	---	Predicted_LncRNA	3.25237	0	-3.25237	0.00190777	0.0554475
MSTRG.3901.1	---	---	---	ENSSSCT00000037115,ENSSSCT00000055274,ENSSSCT00000043927,ENSSSCT00000011275,ENSSSCT00000054514,ENSSSCT00000048602,ENSSSCT00000042371,ENSSSCT00000051856	Predicted_LncRNA	4.28194	2.14033	-2.14162	0.0325669	0.379709
MSTRG.12137.1	---	---	---	ENSSSCT00000063087,ENSSSCT00000045066,ENSSSCT00000065438,ENSSSCT00000017010	Predicted_LncRNA	1.05295	3.06557	2.01262	0.00673482	0.140288
MSTRG.3839.1	---	---	---	ENSSSCT00000065127	Predicted_LncRNA	3.31166	0.896028	-2.41563	0.015023	0.23907
MSTRG.462.1	---	---	---	ENSSSCT00000061260,ENSSSCT00000064267,ENSSSCT00000005081,ENSSSCT00000056655,ENSSSCT00000034080,ENSSSCT00000062025,ENSSSCT00000043785	Predicted_LncRNA	3.80462	2.59618	-1.20844	0.0365427	0.404322
MSTRG.1422.1	---	---	---	---	Predicted_LncRNA	0	3.38339	3.38339	0.00137908	0.0427864
MSTRG.9636.2	---	---	---	---	Predicted_LncRNA	0	2.02497	2.02497	5.33327e-11	6.18608e-09
MSTRG.11867.1	---	---	---	---	Predicted_LncRNA	4.63485	2.72547	-1.90938	0.00115243	0.0367709
MSTRG.10429.9	---	---	---	ENSSSCT00000057961,ENSSSCT00000001333,ENSSSCT00000001334,ENSSSCT00000046293,ENSSSCT00000035823,ENSSSCT00000045563,ENSSSCT00000040724,ENSSSCT00000032859,ENSSSCT00000059693,ENSSSCT00000045536,ENSSSCT00000001329,ENSSSCT00000060690,ENSSSCT00000035331,ENSSSCT00000034266,ENSSSCT00000001524,ENSSSCT00000065399,ENSSSCT00000036412,ENSSSCT00000060203,ENSSSCT00000044584,ENSSSCT00000060862,ENSSSCT00000001335	Predicted_LncRNA	3.31485	1.15314	-2.16171	0.0126113	0.214083
MSTRG.708.6	---	---	---	ENSSSCT00000027331,ENSSSCT00000005527,ENSSSCT00000005525	Predicted_LncRNA	1.63642	0	-1.63642	2.00235e-10	1.78116e-08
MSTRG.3369.1	---	---	---	ENSSSCT00000052506	Predicted_LncRNA	6.1451	4.49195	-1.65315	0.0449657	0.452276
MSTRG.635.1	---	---	---	---	Predicted_LncRNA	2.99178	0.493201	-2.49858	0.0279808	0.348349
MSTRG.11790.1	---	---	---	ENSSSCT00000016444,ENSSSCT00000016443,ENSSSCT00000066069,ENSSSCT00000053444	Predicted_LncRNA	3.23922	1.44714	-1.79208	0.0283426	0.351505
MSTRG.4531.1	---	---	---	ENSSSCT00000066241,ENSSSCT00000063475,ENSSSCT00000061963,ENSSSCT00000055807,ENSSSCT00000017440	Predicted_LncRNA	1.89826	0.254951	-1.64331	0.0170555	0.257333
MSTRG.1466.4	---	---	---	---	Predicted_LncRNA	0	5.81827	5.81827	4.16197e-06	0.000216678
MSTRG.9002.1	---	---	---	---	Predicted_LncRNA	3.04694	0.493201	-2.55374	0.00979143	0.179813
MSTRG.10931.1	---	---	---	ENSSSCT00000036833	Predicted_LncRNA	1.9374	0	-1.9374	0.0272604	0.344319
MSTRG.2574.1	---	---	---	ENSSSCT00000035130	Predicted_LncRNA	8.80247	7.79859	-1.00387	0.014233	0.231717
MSTRG.3492.1	---	---	---	ENSSSCT00000010692,ENSSSCT00000059253	Predicted_LncRNA	3.5084	0.70456	-2.80384	0.0385167	0.41556
MSTRG.4533.1	---	---	---	ENSSSCT00000048138,ENSSSCT00000017441	Predicted_LncRNA	2.80521	1.3382	-1.467	0.0481598	0.468714
MSTRG.2586.2	---	---	---	ENSSSCT00000057643,ENSSSCT00000038449,ENSSSCT00000038600,ENSSSCT00000012305,ENSSSCT00000061798,ENSSSCT00000065216,ENSSSCT00000058024,ENSSSCT00000046638,ENSSSCT00000045527,ENSSSCT00000047447	Predicted_LncRNA	8.89461	7.8402	-1.05441	0.0230606	0.311731
MSTRG.1777.1	---	---	---	---	Predicted_LncRNA	3.31058	0.851616	-2.45896	0.0138675	0.228131
MSTRG.975.1	---	---	---	---	Predicted_LncRNA	3.38854	1.42189	-1.96665	0.0111056	0.196685
MSTRG.106.3	---	---	---	---	Predicted_LncRNA	0	4.5302	4.5302	0.000111793	0.00474543
MSTRG.106.2	---	---	---	---	Predicted_LncRNA	5.78064	1.7791	-4.00154	0.000603246	0.0211435
MSTRG.10313.1	---	---	---	ENSSSCT00000001092	Predicted_LncRNA	2.7952	4.64982	1.85462	0.0468632	0.46265
MSTRG.10032.1	---	---	---	ENSSSCT00000048060,ENSSSCT00000046096,ENSSSCT00000054236,ENSSSCT00000037116,ENSSSCT00000032539	Predicted_LncRNA	5.53895	4.37101	-1.16794	0.0357673	0.400386
MSTRG.1251.1	---	---	---	ENSSSCT00000022751	Predicted_LncRNA	7.30762	6.19213	-1.11549	0.000369565	0.01384
MSTRG.8911.1	---	---	---	ENSSSCT00000034328	Predicted_LncRNA	3.0318	0.764977	-2.26682	0.0079666	0.155426
MSTRG.8911.2	---	---	---	ENSSSCT00000034328	Predicted_LncRNA	4.03703	0	-4.03703	2.51608e-05	0.00119721
MSTRG.10429.15	---	---	---	ENSSSCT00000057961,ENSSSCT00000001333,ENSSSCT00000001334,ENSSSCT00000046293,ENSSSCT00000035823,ENSSSCT00000045563,ENSSSCT00000040724,ENSSSCT00000032859,ENSSSCT00000059693,ENSSSCT00000045536,ENSSSCT00000001329,ENSSSCT00000060690,ENSSSCT00000035331,ENSSSCT00000034266,ENSSSCT00000001524,ENSSSCT00000065399,ENSSSCT00000036412,ENSSSCT00000060203,ENSSSCT00000044584,ENSSSCT00000060862,ENSSSCT00000001335	Predicted_LncRNA	0	2.89089	2.89089	0.0138815	0.228137
MSTRG.7983.2	---	---	---	---	Predicted_LncRNA	3.30306	5.95917	2.65612	0.0208677	0.291911
MSTRG.12296.9	---	---	---	ENSSSCT00000037482	Predicted_LncRNA	17.158	10.802	-6.35605	8.16235e-08	4.64208e-06
MSTRG.12083.2	---	---	---	---	Predicted_LncRNA	4.93455	7.21835	2.28379	4.83392e-05	0.00222787
MSTRG.12703.1	---	---	---	ENSSSCT00000035555	Predicted_LncRNA	3.63484	1.11371	-2.52113	0.013456	0.223653
MSTRG.4635.1	---	---	---	ENSSSCT00000066262,ENSSSCT00000017563	Predicted_LncRNA	3.11034	0	-3.11034	0.000558633	0.0198123
ENSSSCT00000040900	ENSSSCG00000033874	---	---	---	Known_LncRNA	2.75369	1.27524	-1.47845	0.0308991	0.368855
MSTRG.213.1	---	---	---	---	Predicted_LncRNA	1.57998	0	-1.57998	3.05401e-10	2.44841e-08
MSTRG.2106.1	---	---	---	ENSSSCT00000051396,ENSSSCT00000019059	Predicted_LncRNA	0.851783	3.41082	2.55903	0.00183709	0.0535971
MSTRG.3067.1	---	---	---	ENSSSCT00000038564,ENSSSCT00000063961,ENSSSCT00000058021,ENSSSCT00000012871,ENSSSCT00000057255,ENSSSCT00000038018,ENSSSCT00000058149,ENSSSCT00000028290,ENSSSCT00000056472	Predicted_LncRNA	4.80885	3.75617	-1.05268	0.0355954	0.399987
MSTRG.10059.6	---	---	---	ENSSSCT00000065295,ENSSSCT00000025346	Predicted_LncRNA	8.46263	7.44926	-1.01338	0.0198646	0.28233
ENSSSCT00000047750	ENSSSCG00000035707	---	---	---	Known_LncRNA	2.32521	0	-2.32521	0.0319148	0.374624
MSTRG.6744.4	---	---	---	ENSSSCT00000060769,ENSSSCT00000015591,ENSSSCT00000030991	Predicted_LncRNA	2.34587	0.630425	-1.71544	0.0152466	0.240523

## Sheet: DECs
cirRNA_ID	G1	G2	G2_vs_G1_log2FoldChange	G2_vs_G1_Pvalue	G2_vs_G1_FDR
1:121217326|121228255	0	2.08673	2.08673	0.0102861	0.916017
1:128423905|128451024	0	1.79385	1.79385	0.0435429	0.916017
1:128435415|128441443	0.868322	2.72688	1.85856	0.0348968	0.916017
1:189746194|189748073	3.69646	2.18875	-1.50771	0.0112853	0.916017
1:221674329|221675520	0	1.78696	1.78696	0.0170521	0.916017
1:263804087|263814895	2.17826	0	-2.17826	0.0094069	0.916017
1:263873074|263916275	2.35039	0.463176	-1.88722	0.0264149	0.916017
1:39304141|39339171	0	1.74707	1.74707	0.0249005	0.916017
10:32840622|32843863	0.688117	2.94252	2.2544	0.00476423	0.916017
10:68671265|68688441	1.95358	0	-1.95358	0.0218929	0.916017
11:78701356|78703726	2.67771	0.622892	-2.05482	0.0405585	0.916017
12:36103170|36105578	1.28998	2.98311	1.69313	0.0426648	0.916017
12:36144955|36154292	2.53056	0.478406	-2.05216	0.0440055	0.916017
12:39714543|39716761	2.27537	0	-2.27537	0.00277628	0.916017
12:45688138|45693388	2.31545	0.420351	-1.8951	0.0343481	0.916017
12:45860862|45887992	0.348243	2.07088	1.72264	0.0284951	0.916017
13:108951348|108962028	0	1.67413	1.67413	0.029053	0.916017
13:120762855|120778323	0	1.52358	1.52358	0.0474686	0.916017
13:134379236|134384091	1.79974	0	-1.79974	0.0382643	0.916017
13:140602397|140614602	2.09151	0.420351	-1.67116	0.0490178	0.916017
13:1464115|1467192	2.14666	3.32887	1.18221	0.0441135	0.916017
13:1507557|1513988	0.26351	2.31061	2.0471	0.0166771	0.916017
13:160189396|160204775	2.23334	3.48031	1.24697	0.0320101	0.916017
13:16986390|17025247	3.11973	0.910325	-2.2094	0.00642145	0.916017
13:202874107|202875571	2.98864	0.622892	-2.36575	0.0103997	0.916017
13:69061565|69062499	1.10226	2.85473	1.75247	0.0169617	0.916017
14:29281864|29290551	2.70313	1.16558	-1.53755	0.0283271	0.916017
14:30273926|30281504	0	1.69529	1.69529	0.0365815	0.916017
14:32697874|32717747	0	1.56951	1.56951	0.0393136	0.916017
14:35201779|35216911	0	1.67102	1.67102	0.0336203	0.916017
14:48129173|48143955	0	1.81763	1.81763	0.0330269	0.916017
15:110727073|110733645	0.414143	2.49634	2.0822	0.0314201	0.916017
15:671549|678141	0	2.10903	2.10903	0.00695968	0.916017
16:22546397|22572494	2.19862	0.733662	-1.46495	0.0492051	0.916017
16:22558985|22572494	1.90047	0	-1.90047	0.0458268	0.916017
17:5444093|5451779	3.24897	0	-3.24897	0.000288489	0.916017
18:40140465|40143799	0.348243	2.50096	2.15271	0.0114916	0.916017
18:5319586|5321088	2.71302	1.20841	-1.50461	0.0407522	0.916017
2:116928508|116940656	2.18352	0	-2.18352	0.00616487	0.916017
2:16007196|16021491	2.63849	0.420351	-2.21814	0.00902994	0.916017
2:47485144|47494398	1.94445	0	-1.94445	0.0464426	0.916017
3:110991214|110997758	0.951627	2.56494	1.61332	0.0370643	0.916017
3:28653795|28692651	2.28511	0.420351	-1.86476	0.0294599	0.916017
3:49135557|49135742	2.97274	0.478406	-2.49434	0.0171149	0.916017
3:57892680|57898889	2.58002	3.75011	1.17009	0.0215909	0.916017
3:58676460|58678177	0.601861	2.88846	2.2866	0.0424929	0.916017
4:16108248|16121954	2.19438	3.43339	1.23901	0.0398011	0.916017
4:62178830|62187826	4.67584	3.04637	-1.62947	0.0112836	0.916017
4:62178830|62268457	1.64433	0	-1.64433	0.0428154	0.916017
5:23095371|23097565	0.762386	2.98763	2.22525	0.00630399	0.916017
5:304707|308205	3.48611	2.29181	-1.19429	0.0264312	0.916017
5:57883430|57887138	3.37136	1.05441	-2.31695	0.00588096	0.916017
5:69789457|69825894	2.04375	0	-2.04375	0.00901455	0.916017
5:77436970|77447245	0.603384	2.40279	1.79941	0.0213075	0.916017
6:155712041|155724087	2.2381	0	-2.2381	0.00699506	0.916017
6:160761767|160773660	0	1.68868	1.68868	0.0267665	0.916017
6:170449954|170456107	3.84051	2.3047	-1.53581	0.00673218	0.916017
6:20298796|20321216	0	1.53105	1.53105	0.0408807	0.916017
6:20317779|20321216	0.601861	3.07272	2.47086	0.027462	0.916017
6:20415121|20417106	0	1.63238	1.63238	0.0404189	0.916017
6:34513016|34518902	2.25723	0.733662	-1.52357	0.0419547	0.916017
6:37077213|37094925	2.03089	0	-2.03089	0.0132865	0.916017
6:52158350|52159344	0	2.03615	2.03615	0.00603919	0.916017
6:63557493|63558219	1.66975	3.27068	1.60093	0.0155697	0.916017
6:91554750|91596635	0	1.82501	1.82501	0.0295291	0.916017
7:115244498|115244774	0.348243	2.30747	1.95922	0.0242212	0.916017
7:55657733|55661779	0	1.79385	1.79385	0.0435429	0.916017
7:92759405|92785790	1.24225	2.91102	1.66877	0.0457734	0.916017
8:3012369|3014564	6.85247	5.62293	-1.22955	0.014765	0.916017
8:74626204|74627248	0.339874	2.1165	1.77662	0.0440005	0.916017
9:107115041|107126306	0	1.70058	1.70058	0.0339675	0.916017
9:113992721|114007756	1.7128	3.52942	1.81662	0.0320136	0.916017
9:56972613|56973685	3.99866	2.58603	-1.41263	0.023156	0.916017
9:73100284|73124744	1.87413	0	-1.87413	0.0169356	0.916017
9:8706351|8709627	3.68417	2.37397	-1.3102	0.0231785	0.916017
AEMK02000489.1:48635|49141	2.78294	1.16558	-1.61736	0.0247962	0.916017
AEMK02000489.1:48811|49141	1.79974	0	-1.79974	0.0382643	0.916017
AEMK02000510.1:631357|631791	1.2082	2.89006	1.68187	0.0254483	0.916017
AEMK02000695.1:12640|12942	3.77717	2.50402	-1.27315	0.0197075	0.916017
